# Supplementary material for: Three-dimensional microspheres constructed with MoS2 nanosheets supported on multiwalled carbon nanotubes for optimized sodium storage
Source: Royal Society of Chemistry journal article supplement (doi:10.1039/d1nr01736e), 2021-01-01
Supplement: d1nr01736e1.pdf [file d1nr01736e1.pdf]

*Supporting Information*

**Three-dimensional Microspheres Constructed by  
MoS<sub>2</sub> Nanosheets Supported on Multiwalled Carbon  
Nanotubes for Optimized Sodium Storage**

*Lei Chen<sup>1</sup>, Mao Shen<sup>1</sup>, Shi-Bin Ren<sup>\*1</sup>, Yu-Xiang Chen<sup>1</sup>, Wei Li<sup>1</sup>, and De-Man Han<sup>\*\*1</sup>*

<sup>1</sup> School of Pharmaceutical Chemical and Materials Engineering, Taizhou University,

Taizhou, 318000, P. R. China

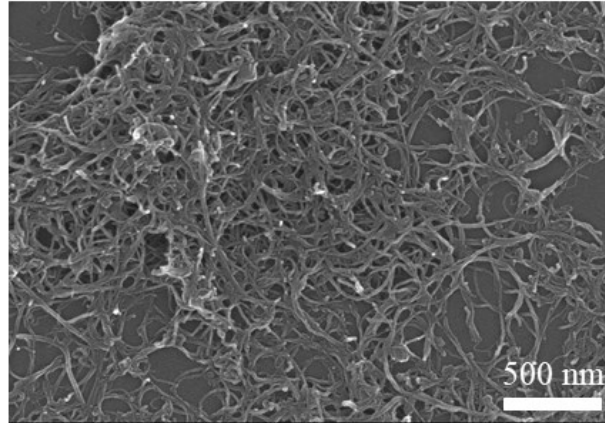

**Figure S1.** The SEM image of MWCNTs.

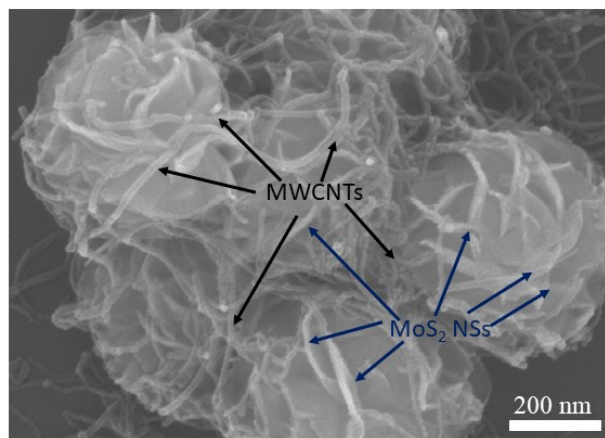

**Figure S2.** SEM images of MoS<sub>2</sub>-MSs/MWCNTs.

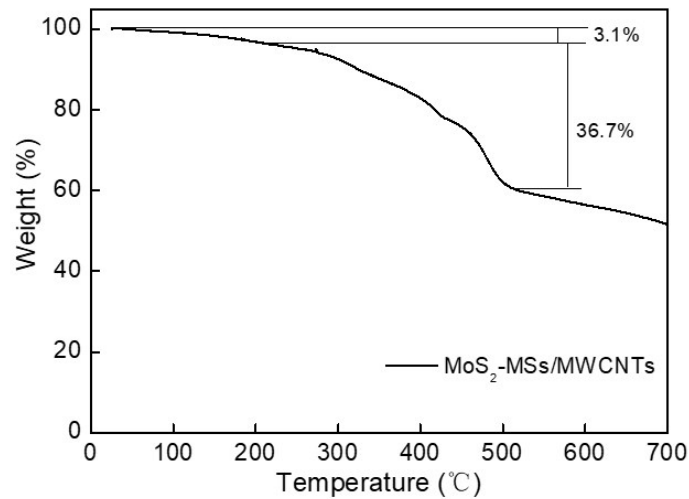

**Figure S3.** Thermal gravimetric curve of MoS<sub>2</sub>-MSs/MWCNTs composite.

Here, MoS<sub>2</sub> was oxidized to MoO<sub>3</sub> completely and MWCNTs were oxidized to CO<sub>2</sub>. Therefore, the MoS<sub>2</sub> content in the composite could be calculated to be about 69.1 wt%, according to the previously reported literatures.

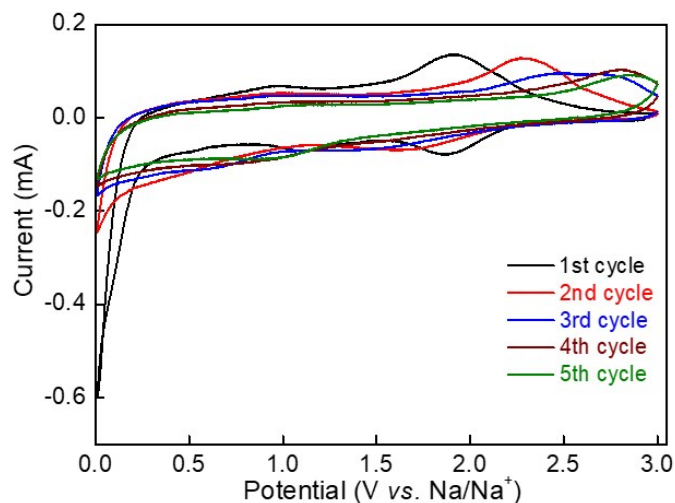

**Figure S4.** CV curves of the initial five cycles for MoS<sub>2</sub>-MSS at 0.1 mV s<sup>-1</sup> within 0.01 and 3.0 V (V vs. Na/Na<sup>+</sup>).

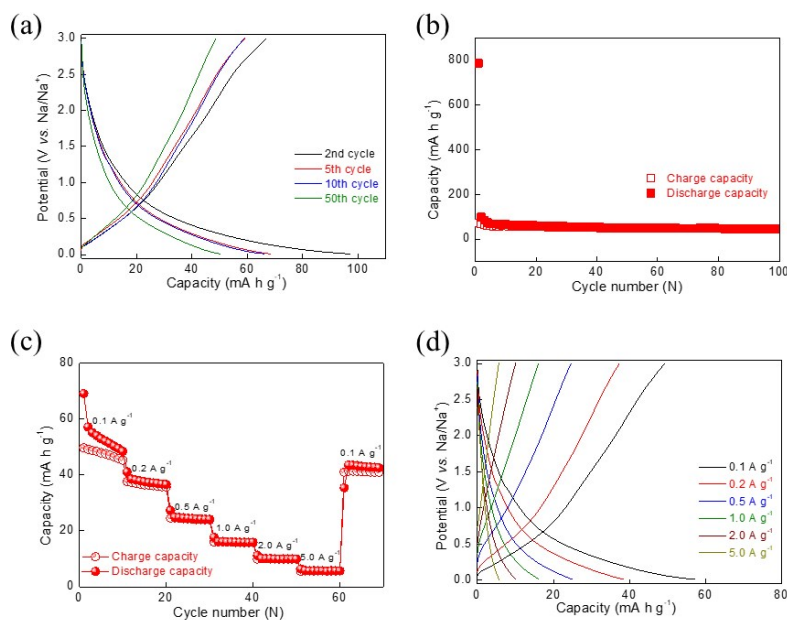

**Figure S5.** Electrochemical performance of MWCNTs electrodes in the voltage window 0.01-3.0 V (V vs. Na/Na<sup>+</sup>): (a) Galvanostatic discharge/charge profiles of 2<sup>nd</sup>, 5<sup>th</sup>, 10<sup>th</sup>, 50<sup>th</sup> cycles at a current density of 0.1 A g<sup>-1</sup>; (b) Cycling performance at 0.1 A g<sup>-1</sup> over 100 cycles; (c) Rate capability at different current densities of 0.1, 0.2, 0.5, 1.0, 2.0 and 5.0 A g<sup>-1</sup>; (d) the charge-discharge curves at the various current densities.

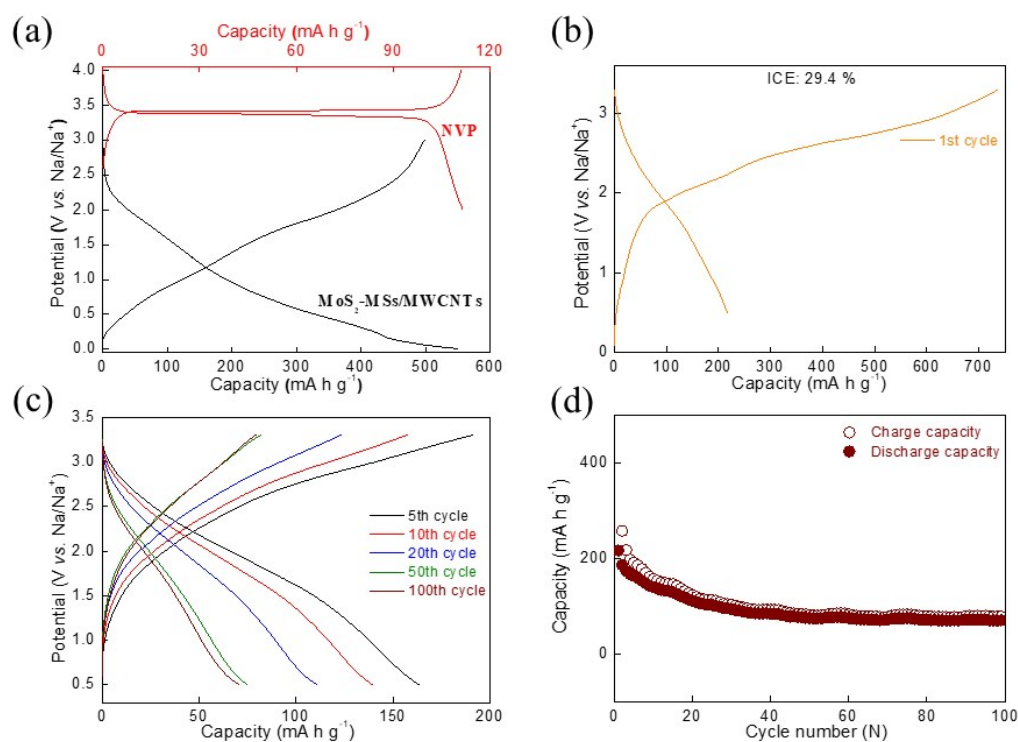

**Figure S6.** Electrochemical performances of MoS<sub>2</sub>-MSs/MWCNTs || Na<sub>3</sub>V<sub>2</sub>(PO<sub>4</sub>)<sub>3</sub> full cell: (a) The Charge-discharge curves of Na||Na<sub>3</sub>V<sub>2</sub>(PO<sub>4</sub>)<sub>3</sub> and Na||MoS<sub>2</sub>-MSs/MWCNTs half batteries; (b) the first GCD curve at 0.1 A g<sup>-1</sup> in the voltage range of 0.5-3.3 V; (c) discharge/charge profiles of 5<sup>th</sup>, 10<sup>th</sup>, 20<sup>th</sup>, 50<sup>th</sup>, 100<sup>th</sup> cycles at 0.1A g<sup>-1</sup>; (d) cycling performance at 0.1 A g<sup>-1</sup> for 100 cycles.

The MoS<sub>2</sub>-MSs/MWCNTs||Na<sub>3</sub>V<sub>2</sub>(PO<sub>4</sub>)<sub>3</sub> full cell was assembled by using MoS<sub>2</sub>-MSs/MWCNTs and Na<sub>3</sub>V<sub>2</sub>(PO<sub>4</sub>)<sub>3</sub> as the anode and cathode, respectively. The current density and capacity of the full cell are based on the anode mass. **Figure S5b** shown the first charge and discharge specific capacities of full-cell were 737.03 and 216.68 mA h g<sup>-1</sup>, respectively, with a low Coulombic efficiency of 29.4 %. The obviously irreversible capacity is mainly attributed to the formation of the SEI layer [S1, S13]. After 100 cycles, the full cell delivers a discharge capacity of 70.96 mA h g<sup>-1</sup> (**Figure S5d**).

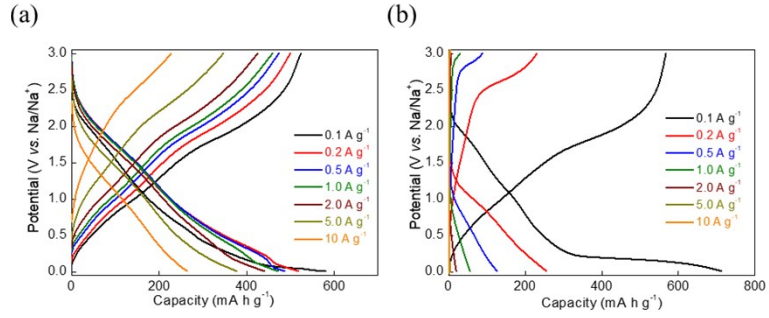

**Figure S7.** discharging-charging profiles of MoS<sub>2</sub>-MSs/MWCNTs (a) and MoS<sub>2</sub>-MSs (b) at various specific currents.

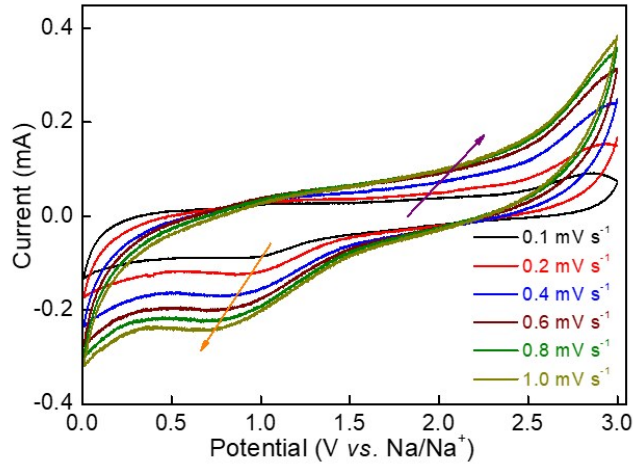

**Figure S8.** CV curves of MoS<sub>2</sub>-MSs at various scan rates from 0.1 to 1.0 mV s<sup>-1</sup>.

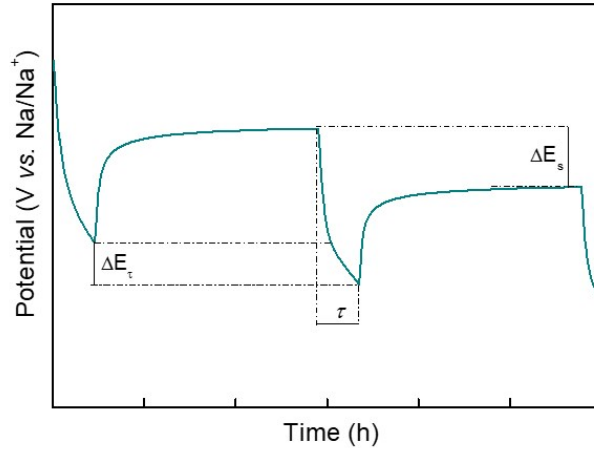

**Figure S9.** A single step of a GITT experiment.

The  $D_{Na^+}$  could be calculated using the formula:

$$D_{Na^+} = \frac{4}{\pi\tau} \left( \frac{m_B V_M}{M_B A} \right)^2 \left( \frac{\Delta E_s}{\Delta E_\tau} \right)^2$$

Where  $\tau$  represents the constant current pulse time;  $m_B$ ,  $M_B$ , and  $V_M$  are the mass, molar weight, and molar volume of the active materials, respectively.  $A$  is the total contact

area between the electrolyte and the electrode.  $\Delta E_s$  and  $\Delta E_t$  are the changes in steady-state voltage after subtracting the IR drop and the total transient change in cell voltage during a single titration (**Figure S8**).

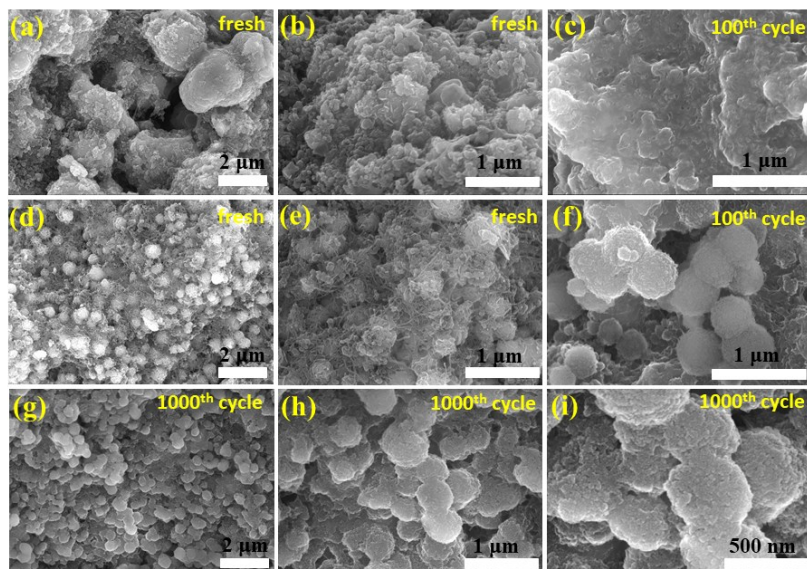

**Figure S10.** SEM images of MoS<sub>2</sub>-MSs before cycling (a & b); after 100 cycles at 0.1 A g<sup>-1</sup> (c); MoS<sub>2</sub>-MSs/MWCNTs before cycling (d & e); after 100 cycles at 0.1 A g<sup>-1</sup> (f); after 1000 cycles at 2.0 A g<sup>-1</sup> (g-i).

**Table S1.** Comparison of the electrochemical performance of MoS<sub>2</sub>-MSs/MWCNTs composite with previously reported MoS<sub>2</sub>-based anode for SIBs.

| <b>Samples</b>                         | <b>Capacity (mA h g<sup>-1</sup>)</b>                  | <b>Retention</b>        | <b>Rate property (mA h g<sup>-1</sup>)</b>             | <b>Ref.</b> |
|----------------------------------------|--------------------------------------------------------|-------------------------|--------------------------------------------------------|-------------|
| <b>N-doped MoS<sub>2</sub>/C</b>       | 599.7 mA h g <sup>-1</sup><br>at 0.1 A g <sup>-1</sup> | 83.4 %<br>(50 cycles)   | 242 mA h g <sup>-1</sup><br>at 5 A g <sup>-1</sup>     | <b>S2</b>   |
| <b>S/MoS<sub>2</sub> architectures</b> | 497.6 mA h g <sup>-1</sup><br>at 0.1 A g <sup>-1</sup> | 83.0 %<br>(100 cycles)  | 243.3 mA h g <sup>-1</sup><br>at 2 A g <sup>-1</sup>   | <b>36</b>   |
| <b>MoS<sub>2</sub>/NCF-MP</b>          | 471.8 mA h g <sup>-1</sup><br>at 0.1 A g <sup>-1</sup> | 101.7 %<br>(100 cycles) | 217 mA h g <sup>-1</sup><br>at 30 A g <sup>-1</sup>    | <b>37</b>   |
| <b>tulip-MoS<sub>2</sub>/NG</b>        | 320 mA h g <sup>-1</sup><br>at 0.1 A g <sup>-1</sup>   | 99.4 %<br>(100 cycles)  | 216 mA h g <sup>-1</sup><br>at 5 A g <sup>-1</sup>     | <b>39</b>   |
| <b>MoS<sub>2</sub>@CF</b>              | 343 mA h g <sup>-1</sup><br>at 0.1 A g <sup>-1</sup>   | 104.9 %<br>(100 cycles) | 171 mA h g <sup>-1</sup><br>at 5 A g <sup>-1</sup>     | <b>40</b>   |
| <b>MoS<sub>2</sub>/CNTs</b>            | 495.9 mA h g <sup>-1</sup><br>at 0.2 A g <sup>-1</sup> | 84.8 %<br>(80 cycles)   | 328.4 mA h g <sup>-1</sup><br>at 0.5 A g <sup>-1</sup> | <b>41</b>   |
| <b>graphene@MoS<sub>2</sub>@C</b>      | 604 mA h g <sup>-1</sup>                               | 86.1 %                  | 304 mA h g <sup>-1</sup>                               | <b>S3</b>   |

|                                                                   |                                                            |                                |                                                           |                      |
|-------------------------------------------------------------------|------------------------------------------------------------|--------------------------------|-----------------------------------------------------------|----------------------|
|                                                                   | at 0.1 A g <sup>-1</sup>                                   | (110 cycles)                   | at 5 A g <sup>-1</sup>                                    |                      |
| <b>MoS<sub>2</sub>/PDC</b>                                        | 475 mA h g <sup>-1</sup><br>at 0.2 A g <sup>-1</sup>       | 85.6 %<br>(340 cycles)         | 301.5 mA h g <sup>-1</sup><br>at 5 A g <sup>-1</sup>      | <b>S4</b>            |
| <b>MoS<sub>2</sub>@C-CMC</b>                                      | 352 mA h g <sup>-1</sup><br>at 0.08 A g <sup>-1</sup>      | 81.2 %<br>(100 cycles)         | 205 mA h g <sup>-1</sup><br>at 1 A g <sup>-1</sup>        | <b>S5</b>            |
| <b>MoS<sub>2</sub> nanosheets<br/>/Carbon Fibers</b>              | 362 mA h g <sup>-1</sup><br>at 0.1 A g <sup>-1</sup>       | 91.2 %<br>(100 cycles)         | 225 mA h g <sup>-1</sup><br>at 1 A g <sup>-1</sup>        | <b>S6</b>            |
| <b>MoS<sub>2</sub>-reduced<br/>graphene oxide (rGO)</b>           | 345 mA h g <sup>-1</sup><br>at 0.1 A g <sup>-1</sup>       | 88.4 %<br>(50 cycles)          | 245 mA h g <sup>-1</sup><br>at 1 A g <sup>-1</sup>        | <b>S7</b>            |
| <b>MoS<sub>2</sub>/C-MWCNT</b>                                    | 617 mA h g <sup>-1</sup><br>at 0.2 A g <sup>-1</sup>       | 83.9 %<br>(300 cycles)         | 324 mA h g <sup>-1</sup> at<br>20 A g <sup>-1</sup>       | <b>45</b>            |
| <b>Nervous-like<br/>MoS<sub>2</sub>/MWCNT</b>                     | 571 mA h g <sup>-1</sup><br>at 0.1 A g <sup>-1</sup>       | 92.4 %<br>(110 cycles)         | 411 mA h g <sup>-1</sup><br>at 2 A g <sup>-1</sup>        | <b>46</b>            |
| <b>Graphene-Wrapped<br/>MoS<sub>2</sub> (MoS<sub>2</sub>-G)</b>   | 495.1 mA h g <sup>-1</sup><br>at 0.2 A g <sup>-1</sup>     | 82.5 %<br>(100 cycles)         | 345 mA h g <sup>-1</sup><br>at 1.6 A g <sup>-1</sup>      | <b>S8</b>            |
| <b>MoS<sub>2</sub>-rGO/HCS</b>                                    | 635 mA h g <sup>-1</sup><br>at 0.1 A g <sup>-1</sup>       | 86.9 %<br>(100 cycles)         | 364 mA h g <sup>-1</sup><br>at 5 A g <sup>-1</sup>        | <b>S9</b>            |
| <b>MoS<sub>2</sub>@C nanotube<br/>composite</b>                   | 640 mA h g <sup>-1</sup><br>at 0.5 C                       | 80 %<br>(200 cycles)           | 370 mA h g <sup>-1</sup><br>at 5 C                        | <b>S10</b>           |
| <b>MoS<sub>2</sub>@C nanosheets<br/>@MoS<sub>2</sub> nanorods</b> | 477 mA h g <sup>-1</sup><br>at 0.1 A g <sup>-1</sup>       | 86.3 %<br>(100 cycles)         | 284 mA h g <sup>-1</sup><br>at 4 A g <sup>-1</sup>        | <b>S11</b>           |
| <b>CNT@NCT@W-<br/>MoS<sub>2</sub>/C</b>                           | 530 mA h g <sup>-1</sup><br>at 0.1 A g <sup>-1</sup>       | —                              | 230 mA h g <sup>-1</sup><br>at 2 A g <sup>-1</sup>        | <b>S12</b>           |
| <b>MoS<sub>2</sub>-C nanosheets</b>                               | 383.4 mA h g <sup>-1</sup><br>at 0.1 A g <sup>-1</sup>     | 101.3 %<br>(100 cycles)        | 275 mA h g <sup>-1</sup><br>at 8 A g <sup>-1</sup>        | <b>S13</b>           |
| <b>N-MoS<sub>2</sub>/C</b>                                        | 649 mA h g <sup>-1</sup><br>at 0.2 C                       | 78 %<br>(200 cycles)           | 387.9 mA h g <sup>-1</sup><br>at 10 C                     | <b>S14</b>           |
| <b>1T-MoS<sub>2</sub>/CC arrays</b>                               | 768 mA h g <sup>-1</sup><br>at 0.2 A g <sup>-1</sup>       | 80 %<br>(200 cycles)           | 276 mA h g <sup>-1</sup><br>at 2 A g <sup>-1</sup>        | <b>53</b>            |
| <b>MoS<sub>2</sub>-MSs/MWCNTs<br/>composite</b>                   | <b>550 mA h g<sup>-1</sup><br/>at 0.1 A g<sup>-1</sup></b> | <b>94.4 %<br/>(100 cycles)</b> | <b>227 mA h g<sup>-1</sup><br/>at 10 A g<sup>-1</sup></b> | <b>This<br/>work</b> |

**Table S2.** The calculated values of SEI layer resistance ( $R_{SEI}$ ), charge-transfer resistance ( $R_{ct}$ ),  $\sigma$  and sodium-ion diffusion coefficient ( $D_{Na^+}$ ) for both samples.

| Samples                      | $R_{SEI}$ ( $\Omega$ ) | $R_{ct}$ ( $\Omega$ ) | $\sigma$ | $D_{Na^+}$ ( $cm^2 s^{-1}$ ) |
|------------------------------|------------------------|-----------------------|----------|------------------------------|
| MoS <sub>2</sub> -MSs        | 201.7                  | 14.95                 | 117.84   | $2.14 \times 10^{-11}$       |
| MoS <sub>2</sub> -MSs/MWCNTs | 19.05                  | 78.72                 | 16.67    | $0.89 \times 10^{-12}$       |

## References

[S1] N. Wang, Z. Bai, Y. Qian, J. Yang. Double-Walled Sb@TiO<sub>2-x</sub> Nanotubes as a Superior High-Rate and Ultralong-Lifespan Anode Material for Na-Ion and Li-Ion

Batteries. *Adv. Mater.* **2016**, *28*, 4126-4133.

[S2] Y. S. Cai, H. L. Yang, J. Zhou, Z. G. Luo, G. Z. Fang, S. N. Liu, A. Q. Pan, S. Q. Liang. Nitrogen doped hollow MoS<sub>2</sub>/C nanospheres as anode for long-life sodium-ion batteries. *Chem. Eng. J.* **2017**, *327*, 522-529.

[S3] Y. Q. Teng, H. L. Zhao, Z. J. Zhang, L. Zhao, Y. Zhang, Z. L. Li, Q. Xia, Z. H. Du, K. Swierczek. MoS<sub>2</sub> Nanosheets Vertically Grown On Reduced Graphene Oxide via Oxygen Bonds with Carbon Coating as Ultrafast Sodium Ion Batteries Anodes. *Carbon* **2017**, *119*, 91-100.

[S4] M. Lin, M. Deng, C. Zhou, Y. Shu, L. Yang, L. Ouyang, Q. Gao, M. Zhu. Popcorn derived carbon enhances the cyclic stability of MoS<sub>2</sub> as an anode material for sodium-ion batteries. *Electrochim. Acta* **2019**, *309*, 25-33.

[S5] X. Xie, T. Makaryan, M. Zhao, K. L. V. Aken, Y. Gogotsi, G. Wang. MoS<sub>2</sub> Nanosheets Vertically Aligned on Carbon Paper: A Freestanding Electrode for Highly Reversible Sodium-Ion Batteries. *Adv. Energy Mater.* **2016**, *6*, 1502161.

[S6] Y. Zhang, H. Tao, T. Li, S. Du, J. Li, Y. Zhang, X. Yang. Vertically Oxygen-Incorporated MoS<sub>2</sub> Nanosheets Coated on Carbon Fibers for Sodium-Ion Batteries. *ACS Appl. Mater. Interfaces* **2018**, *10*, 35206-35215.

[S7] W. Qin, T. Chen, L. Pan, L. Niu, B. Hu, D. Li, J. Li, Z. Sun. MoS<sub>2</sub>-reduced graphene oxide composites via microwave assisted synthesis for sodium ion battery anode with improved capacity and cycling performance. *Electrochim. Acta* **2015**, *153*, 55-61.

[S8] S. Anwer, Y. Huang, B. Li, B. Govindan, K. Liao, W. J. Cantwell, F. Wu, R. Chen, L. Zheng. Nature-Inspired, Graphene-Wrapped 3D MoS<sub>2</sub> Ultrathin Microflower Architecture as a High-Performance Anode Material for Sodium-Ion Batteries. *ACS Appl. Mater. Interfaces* **2019**, *11*, 22323-22331.

[S9] X. Hu, Y. Li, G. Zeng, J. Jia, H. Zhan, Z. Wen. Three-Dimensional Network Architecture with Hybrid Nanocarbon Composites Supporting Few-Layer MoS<sub>2</sub> for Lithium and Sodium Storage. *ACS Nano* **2018**, *12*, 1592-1602.

[S10] X. Zhang, X. Li, J. Liang, Y. Zhu, Y. Qian. Synthesis of MoS<sub>2</sub>@C Nanotubes Via the Kirkendall Effect with Enhanced Electrochemical Performance for Lithium Ion



and Sodium Ion Batteries. *Small* **2016**, *12*, 2484-2491.

[S11] G. K. Veerasubramani, M.-S. Park, G. Nagaraju, D.-W. Kim. Unraveling the Na-ion storage performance of a vertically aligned interlayer-expanded two-dimensional MoS<sub>2</sub>@C@MoS<sub>2</sub> heterostructure. *J. Mater. Chem. A* **2019**, *7*, 24557-24568.

[S12] Y. Wang, Y. Yang, D. Zhang, Y. Wang, X. Luo, X. Liu, J.-K. Kim, Y. Luo. Inter-overlapped MoS<sub>2</sub>/C composites with large-interlayer-spacing for high-performance sodium-ion batteries. *Nanoscale Horiz.* **2020**, *5*, 1127-1135.

[S13] W. Zhang, H. Zhou, Z. Huang, S. Li, C. Wang, H. Li, Z. Yan, T. Hou, Y. Kuang. 3D hierarchical microspheres constructed by ultrathin MoS<sub>2</sub>-C nanosheets as high-performance anode material for sodium-ion batteries. *J. Energy Chem.* **2020**, *49*, 307-315.

[S14] H. Lim, H. Kim, S.-O. Kima, W. Choi. Self-assembled N-doped MoS<sub>2</sub>/carbon spheres by naturally occurring acid-catalyzed reaction for improved sodium-ion batteries. *Chem. Eng. J.* **2020**, *387*, 124144.
